# Supplementary material
Source: publisher figshare collection journal article supplement (https://acs.figshare.com/ndownloader/files/3823180)
Supplement: Supplementary file 1 [file 3823180]

## Supporting Information

### Rh/ZrP<sub>2</sub>O<sub>7</sub> as an Efficient Automotive Catalyst for NO<sub>x</sub> Reduction under Slightly Lean Conditions

Yuki Nagao,<sup>†‡\*</sup> Yunosuke Nakahara,<sup>†</sup> Takahiro Sato,<sup>†</sup> Hironori Iwakura,<sup>†</sup>  
Shoya Takeshita,<sup>‡</sup> Saki Minami,<sup>‡</sup> Hiroshi Yoshida,<sup>‡§</sup> Masato Machida<sup>†§\*</sup>

<sup>†</sup> Catalysts Strategic Division, Engineered Materials Sector, Mitsui Mining & Smelting Co., Ltd.

<sup>‡</sup> Department of Applied Chemistry and Biochemistry, Graduate School of Science and Technology, Kumamoto University

<sup>§</sup> Unit of Elements Strategy Initiative for Catalysts & Batteries, Kyoto University

\* E-mail: machida@kumamoto-u.ac.jp; y\_nagao@mitsui-kinzoku.co.jp

**Figure S1.** XRD patterns of as-prepared a) AlPO<sub>4</sub>, b) YPO<sub>4</sub>, c) ZrP<sub>2</sub>O<sub>7</sub> and d) LaPO<sub>4</sub>.

**Figure S2.** *In situ* diffuse reflectance FT-IR spectra of adsorbed species formed on ZrP<sub>2</sub>O<sub>7</sub> and ZrO<sub>2</sub> powders in gas mixtures of a) 0.8% C<sub>3</sub>H<sub>6</sub>, 0.5% O<sub>2</sub>, and He balance (rich), b) 0.35% C<sub>3</sub>H<sub>6</sub> + 3.25% O<sub>2</sub>, and He balance (lean), and c) 1% C<sub>3</sub>H<sub>6</sub> and He balance at 300 °C.

**Figure S3.** Fourier transforms of *k*<sup>3</sup>-weighted Rh K-edge EXAFS of supported Rh catalysts without phase shift corrections.

**Figure S4.** FT-IR differential spectra of pyridine adsorbed onto ZrP<sub>2</sub>O<sub>7</sub> and ZrO<sub>2</sub> at 50 °C and subsequent evacuation.

**Table S1.** Composition of simulated exhaust gas mixtures (NO-CO-C<sub>3</sub>H<sub>6</sub>-O<sub>2</sub>-H<sub>2</sub>-CO<sub>2</sub>-H<sub>2</sub>O) for 14.2 ≤ A/F ≤ 14.8 in test mode A.

**Table S2.** Composition of simulated exhaust gas mixtures (NO-CO-C<sub>3</sub>H<sub>6</sub>-O<sub>2</sub>-CO<sub>2</sub>-H<sub>2</sub>O) for 14.6 ≤ A/F ≤ 15.3 in test mode B.

**Table S3.** Composition of simulated exhaust gas mixtures (NO-CO-O<sub>2</sub>-CO<sub>2</sub>-H<sub>2</sub>O) for 14.6 ≤ A/F ≤ 15.3 in test mode C.

**Table S4.** Composition of simulated exhaust gas mixtures (NO-C<sub>3</sub>H<sub>6</sub>-O<sub>2</sub>-CO<sub>2</sub>-H<sub>2</sub>O) for 14.6 ≤ A/F ≤ 15.3 in test mode D.

**Table S5.** Fitting results of Rh K-edge EXAFS analysis

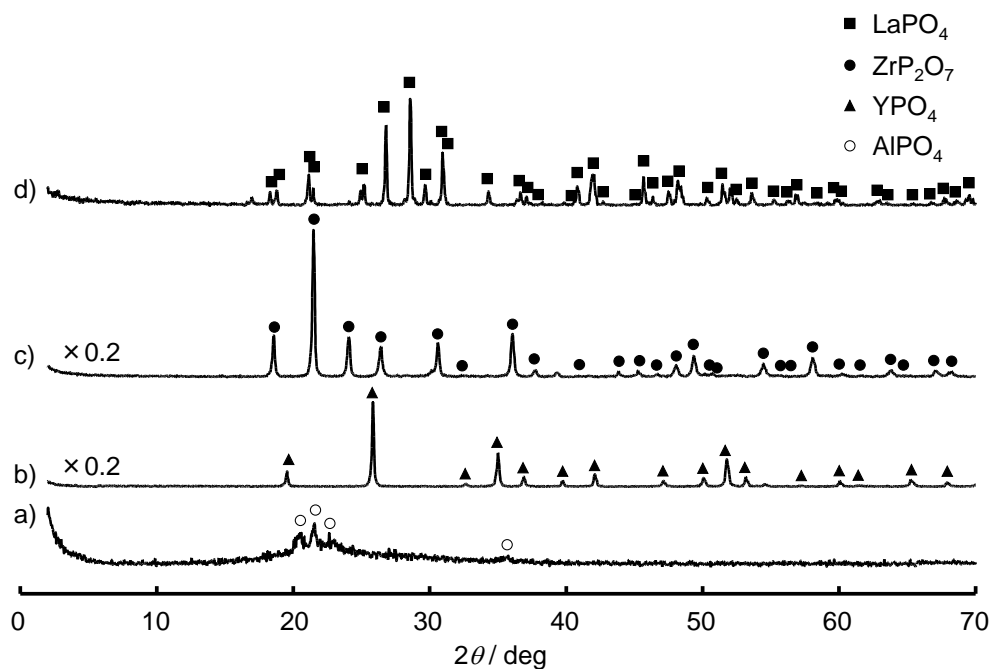

**Figure S1.** XRD patterns of as-prepared a)  $\text{AlPO}_4$ , b)  $\text{YPO}_4$ , c)  $\text{ZrP}_2\text{O}_7$  and d)  $\text{LaPO}_4$ .

Figure S1 shows the XRD patterns of four types of metal phosphates after calcination. Diffraction peaks are attributed to monophasic metal phosphates with hexagonal  $\text{AlPO}_4$  tridymite-type structure ( $P6_3mc$ , 5.097 Å, 8.344 Å)<sup>1</sup>, tetragonal  $\text{YPO}_4$  with xenotime-type structure, ( $I4_1/amdZ$ , 6.882 Å, 6.882 Å, 6.018 Å)<sup>2</sup>, monoclinic  $\text{LaPO}_4$  with monazite-type structure, ( $P12_1/n$  1, 6.825 Å, 7.057 Å, 6.482 Å, 103.2°)<sup>3</sup> and cubic  $\text{ZrP}_2\text{O}_7$  ( $Pa-3$ , 8.293 Å)<sup>4</sup>.

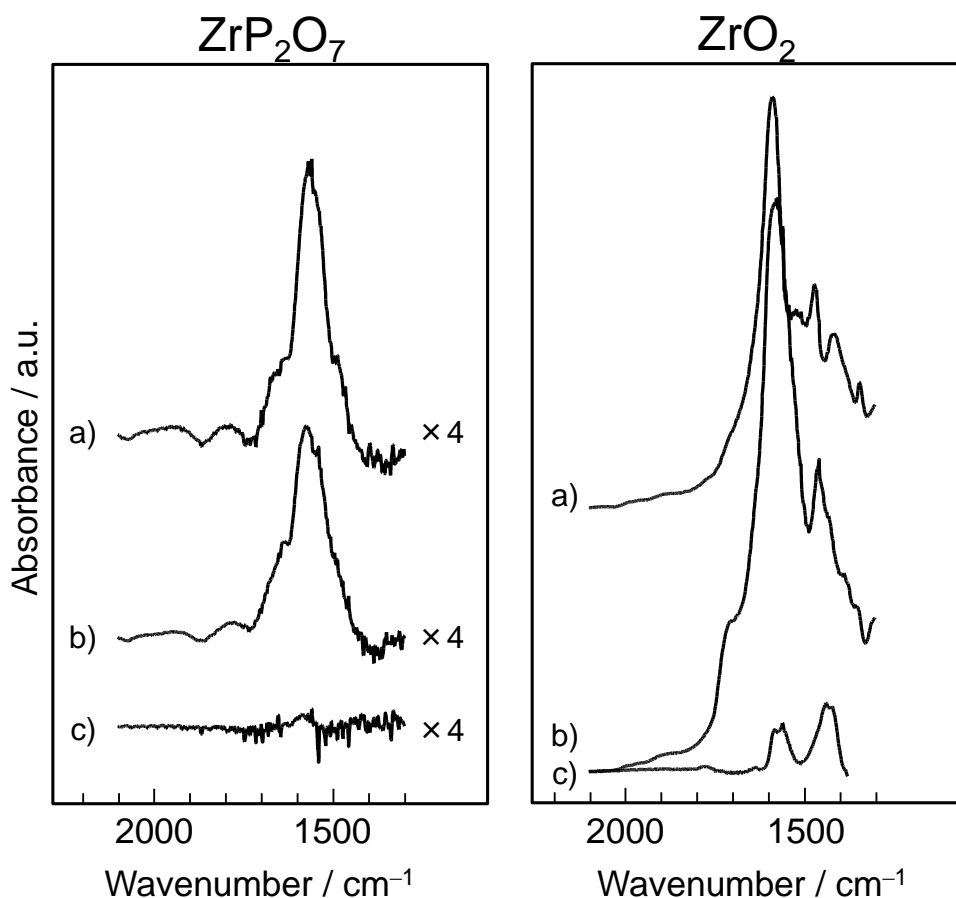

**Figure S2.** *In situ* diffuse reflectance FT-IR spectra of adsorbed species formed on  $\text{ZrP}_2\text{O}_7$  and  $\text{ZrO}_2$  powders in gas mixtures of a) 0.8%  $\text{C}_3\text{H}_6$ , 0.5%  $\text{O}_2$ , and He balance (rich), b) 0.35%  $\text{C}_3\text{H}_6$  + 3.25%  $\text{O}_2$ , and He balance (lean), and c) 1%  $\text{C}_3\text{H}_6$  and He balance at 300 °C.

$\text{C}_3\text{H}_6$  was adsorbed onto  $\text{ZrP}_2\text{O}_7$  and  $\text{ZrO}_2$  in the presence of  $\text{O}_2$  to form aldehyde and carboxylate species, respectively. The intensity of observed bands for these Rh-unloaded support materials were as the same as those for Rh-loaded catalysts (**Figures 8 and 9**). These partially oxidized species were therefore adsorbed on the surface of support materials. Also, these species were formed in a similar way under the rich and lean conditions (a and b), but they were significantly decreased in the absence of  $\text{O}_2$  (c).

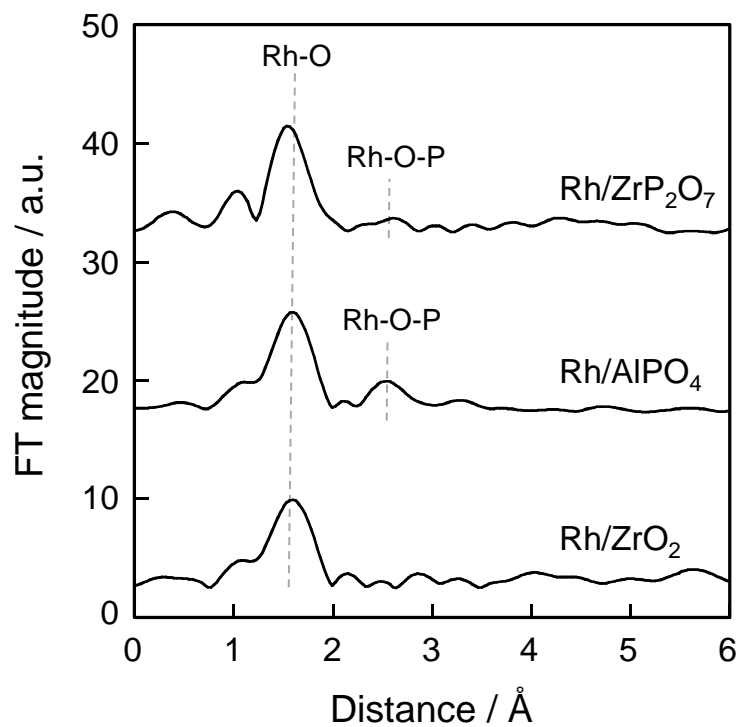

**Figure S3.** Fourier transforms of  $k^3$ -weighted Rh K-edge EXAFS of supported Rh catalysts without phase shift corrections. See **Table S5** for curve-fitting results and explanation of this figure.

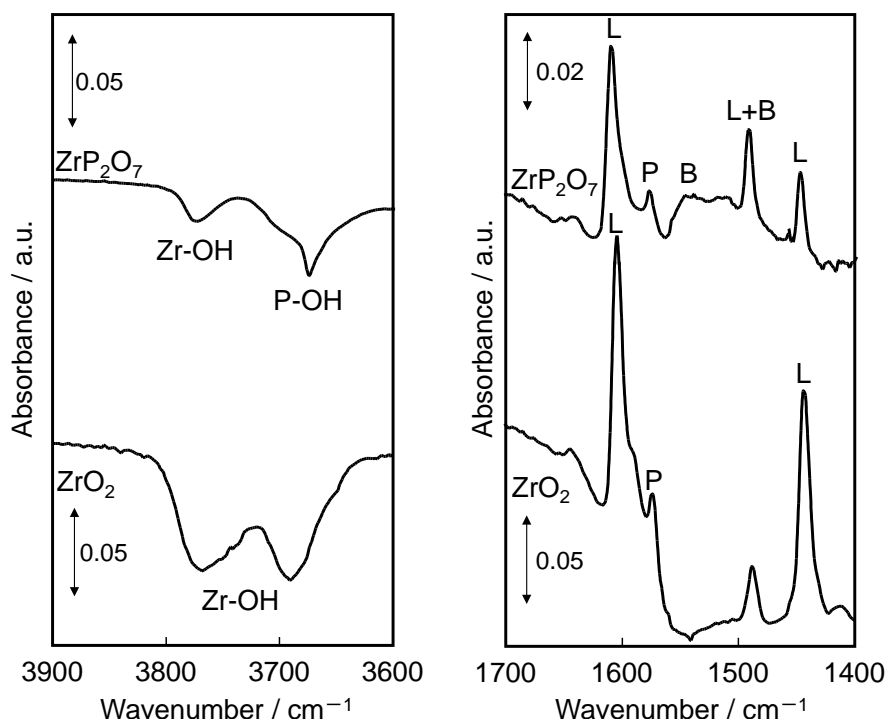

**Figure S4.** FT-IR differential spectra of pyridine adsorbed onto  $\text{ZrP}_2\text{O}_7$  and  $\text{ZrO}_2$  at 50 °C and subsequent evacuation. P: physisorbed pyridine, B: pyridine chemisorbed on Brønsted acid sites, L: pyridine chemisorbed on Lewis acid sites.

*In situ* FT-IR of pyridine chemisorption was carried out at 50 °C after dehydration at 500 °C in a He flow. The spectra obtained after subsequent evacuation at 50 °C were referenced to that of the sample in a He flow just before pyridine adsorption.  $\text{ZrP}_2\text{O}_7$  yielded bands assignable to pyridine coordinated to Lewis acid site (L: 1610, 1492, and 1448  $\text{cm}^{-1}$ ) and to pyridinium ion adsorbed on Brønsted site (B: 1545, 1492  $\text{cm}^{-1}$ ) as reported by several researchers.<sup>5-7</sup> Simultaneously with the appearance of these bands, P–OH (3676  $\text{cm}^{-1}$ ) and Zr–OH (3773  $\text{cm}^{-1}$ ) bands were weakened. These results suggest that surface hydroxyl groups of  $\text{ZrP}_2\text{O}_7$  act as both Lewis and Brønsted acid sites. By contrast,  $\text{ZrO}_2$  yielded bands assigned only to Lewis acid site (L: 1604, 1488, and 1444  $\text{cm}^{-1}$ ).

**Table S1.** Composition of simulated exhaust gas mixtures (NO-CO-C<sub>3</sub>H<sub>6</sub>-O<sub>2</sub>-H<sub>2</sub>-CO<sub>2</sub>-H<sub>2</sub>O) for  $14.2 \leq A/F \leq 14.8$  in test mode A.

|                                     |      |      |      |      |      |      |
|-------------------------------------|------|------|------|------|------|------|
| A/F <sup>a</sup>                    | 14.2 | 14.4 | 14.5 | 14.6 | 14.7 | 14.8 |
| CO / %                              | 1.00 | 0.73 | 0.60 | 0.50 | 0.44 | 0.40 |
| H <sub>2</sub> / %                  | 0.33 | 0.24 | 0.20 | 0.17 | 0.15 | 0.13 |
| C <sub>3</sub> H <sub>6</sub> / ppm | 400  | ←    | ←    | ←    | ←    | ←    |
| NO / ppm                            | 500  | ←    | ←    | ←    | ←    | ←    |
| O <sub>2</sub> / %                  | 0.35 | 0.41 | 0.45 | 0.50 | 0.55 | 0.60 |
| CO <sub>2</sub> / %                 | 14.0 | ←    | ←    | ←    | ←    | ←    |
| H <sub>2</sub> O / %                | 10.0 | ←    | ←    | ←    | ←    | ←    |

<sup>a</sup> The A/F value is calculated according to the literature<sup>8</sup> using following excess oxygen ratio of the simulated gas feed.

$$\begin{aligned} \text{Excess oxygen ratio} &= \frac{\text{Amount of oxygen in gas feed}}{\text{Amount of oxygen required for complete oxidation}} \\ &= \frac{2 \times p_{\text{O}_2} + p_{\text{NO}}}{9 \times p_{\text{C}_3\text{H}_6} + p_{\text{CO}} + p_{\text{H}_2}} \end{aligned}$$

**Table S2.** Composition of simulated exhaust gas mixtures (NO-CO-C<sub>3</sub>H<sub>6</sub>-O<sub>2</sub>-CO<sub>2</sub>-H<sub>2</sub>O) for  $14.6 \leq A/F \leq 15.3$  in test mode B.

|                                     |      |      |      |      |      |      |      |      |
|-------------------------------------|------|------|------|------|------|------|------|------|
| A/F <sup>a</sup>                    | 14.6 | 14.7 | 14.8 | 14.9 | 15.0 | 15.1 | 15.2 | 15.3 |
| CO / %                              | 0.69 | 0.59 | 0.52 | 0.52 | 0.50 | 0.40 | 0.40 | 0.30 |
| C <sub>3</sub> H <sub>6</sub> / ppm | 400  | ←    | ←    | ←    | ←    | ←    | ←    | ←    |
| NO / ppm                            | 500  | ←    | ←    | ←    | ←    | ←    | ←    | ←    |
| O <sub>2</sub> / %                  | 0.50 | 0.55 | 0.60 | 0.69 | 0.81 | 0.84 | 0.96 | 0.93 |
| CO <sub>2</sub> / %                 | 14.0 | ←    | ←    | ←    | ←    | ←    | ←    | ←    |
| H <sub>2</sub> O / %                | 10.0 | ←    | ←    | ←    | ←    | ←    | ←    | ←    |

<sup>a</sup> See Table S1.

**Table S3.** Composition of simulated exhaust gas mixtures (NO-CO-O<sub>2</sub>-CO<sub>2</sub>-H<sub>2</sub>O) for  $14.6 \leq A/F \leq 15.3$  in test mode C.

| A/F <sup>a</sup>     | 14.6 | 14.7 | 14.8 | 14.9 | 15.0 | 15.1 | 15.2 | 15.3 |
|----------------------|------|------|------|------|------|------|------|------|
| CO / %               | 0.69 | 0.59 | 0.52 | 0.52 | 0.50 | 0.40 | 0.40 | 0.30 |
| NO / ppm             | 500  | ←    | ←    | ←    | ←    | ←    | ←    | ←    |
| O <sub>2</sub> / %   | 0.32 | 0.33 | 0.34 | 0.40 | 0.46 | 0.43 | 0.49 | 0.41 |
| CO <sub>2</sub> / %  | 14.0 | ←    | ←    | ←    | ←    | ←    | ←    | ←    |
| H <sub>2</sub> O / % | 10.0 | ←    | ←    | ←    | ←    | ←    | ←    | ←    |

<sup>a</sup> See Table S1.

**Table S4.** Composition of simulated exhaust gas mixtures (NO-C<sub>3</sub>H<sub>6</sub>-O<sub>2</sub>-CO<sub>2</sub>-H<sub>2</sub>O) for  $14.6 \leq A/F \leq 15.3$  in test mode D.

| A/F <sup>a</sup>                    | 14.6 | 14.7 | 14.8 | 14.9 | 15.0 | 15.1 | 15.2 | 15.3 |
|-------------------------------------|------|------|------|------|------|------|------|------|
| C <sub>3</sub> H <sub>6</sub> / ppm | 400  | ←    | ←    | ←    | ←    | ←    | ←    | ←    |
| NO / ppm                            | 500  | ←    | ←    | ←    | ←    | ←    | ←    | ←    |
| O <sub>2</sub> / %                  | 0.16 | 0.19 | 0.23 | 0.27 | 0.33 | 0.38 | 0.44 | 0.50 |
| CO <sub>2</sub> / %                 | 14.0 | ←    | ←    | ←    | ←    | ←    | ←    | ←    |
| H <sub>2</sub> O / %                | 10.0 | ←    | ←    | ←    | ←    | ←    | ←    | ←    |

<sup>a</sup> See Table S1.

**Table S5.** Fitting results of Rh K-edge EXAFS analysis

| Catalyst                                 | shell   | CN <sup>a</sup><br>(±0.2) | <i>r</i> /Å <sup>b</sup><br>(±0.03) | $\sigma^2/10^{-2}$ Å <sup>2</sup> <sup>c</sup><br>(±0.02) |
|------------------------------------------|---------|---------------------------|-------------------------------------|-----------------------------------------------------------|
| 2 wt% Rh/ZrP <sub>2</sub> O <sub>7</sub> | Rh–O    | 2.9                       | 2.01                                | 0.15                                                      |
|                                          | Rh–O–P  | 0.89                      | 3.12                                | 0.36                                                      |
| 0.4 wt% Rh/AlPO <sub>4</sub>             | Rh–O    | 4.3                       | 2.03                                | 0.15                                                      |
|                                          | Rh–Rh   | 0.32                      | 2.69                                | 0.42                                                      |
|                                          | Rh–O–P  | 1.4                       | 3.09                                | 0.36                                                      |
|                                          | Rh–O–Rh | 0.19                      | 3.54                                | 0.64                                                      |
| 2 wt% Rh/ZrO <sub>2</sub>                | Rh–O    | 4.1                       | 2.04                                | 0.15                                                      |

Interval of *k*-space to *r*-space of FT is 3.0-14.0 Å<sup>-1</sup>.

<sup>a</sup>Coordination number.

<sup>b</sup>Atomic distance.

<sup>c</sup>Debye-Waller factor.

**Table S5** compares structural parameters for as-prepared supported Rh catalysts in **Figure S3**. These catalysts showed an intense peak at approximately 0.2 nm, which was attributed to a Rh–O shell of Rh oxide (Rh<sub>2</sub>O<sub>3</sub>). In the second coordination, a contribution of the Rh–O–P shell was observed in Rh/ZrP<sub>2</sub>O<sub>7</sub> as was reported for Rh/AlPO<sub>4</sub> in our previous manuscript,<sup>9</sup> suggesting interfacial bonding between Rh and a phosphate unit (PO<sub>4</sub>). Rh/ZrO<sub>2</sub> showed no such second coordination shell indicative of the metal-support bonding. The higher Rh loading (2 wt%) was used for Zr-containing supports to ensure the to ensure a good quality signal for curve fitting analysis.



## References

1. Graetsch, H. A., *Acta Crystallogr. Sect. C: Cryst. Struct. Commun.* **2001**, 57, 665-667.
2. Milligan, W. O.; Mullica, D. F.; Beall, G. W.; Boatner, L. A., *Inorg. Chim. Acta* **1982**, 60, 39-43.
3. Mullica, D. F.; Milligan, W. O.; Grossie, D. A.; Beall, G. W.; Boatner, L. A., *Inorg. Chim. Acta* **1984**, 95, 231-236.
4. Khosrovani, N.; Korthuis, V.; Sleight, A. W.; Vogt, T., *Inorg. Chem.* **1996**, 35, 485-489.
5. Peri, J. B., *Discussions of the Faraday Society* **1971**, 52, 55-65.
6. Bautista, F. M.; Campelo, J. M.; Garcia, A.; Luna, D.; Marinas, J. M.; Romero, A. A.; Navio, J. A.; Macias, M., *J. Catal.* **1994**, 145, 107-125.
7. Campelo, J. M.; Garcia, A.; Herencia, J. F.; Luna, D.; Marinas, J. M.; Romero, A. A., *J. Catal.* **1995**, 151, 307-314.
8. Tanaka, H.; Hirotooshi, F.; Takahashi, I., *SAE Paper* **1995**, 950256.
9. Machida, M.; Minami, S.; Ikeue, K.; Hinokuma, S.; Nagao, Y.; Sato, T.; Nakahara, Y., *Chem. Mater.* **2014**, 26, 5799-5805.
